# Supplementary material for: Sequencing and de novo analysis of a coral larval transcriptome using 454 GSFlx
Source: PubMed Central journal article supplement (PMC2689275; doi:10.1186/1471-2164-10-219), 2009-05-12

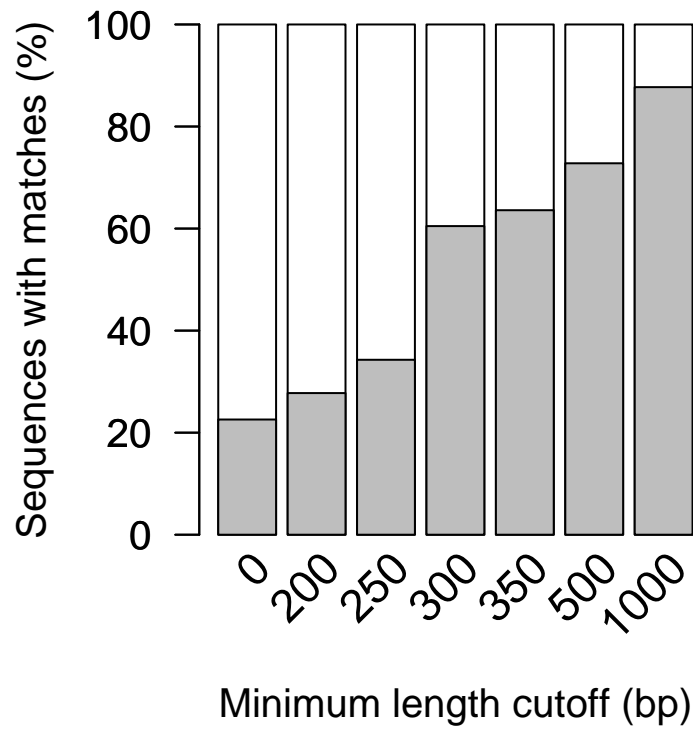

Supplement: 1471-2164-10-219-S2.pdf [file 1471-2164-10-219-S2.pdf]
